# Supplementary material for: Photo-induced direct interfacial charge transfer at TiO2 modified with hexacyanoferrate(iii)
Source: Royal Society of Chemistry journal article supplement (doi:10.1039/c8pp00237a), 2018-08-08
Supplement: c8pp00237a1.pdf [file c8pp00237a1.pdf]

## Electronic Supplementary Information (ESI)

### Photo-induced direct interfacial charge transfer at TiO<sub>2</sub> modified with hexacyanoferrate(III)

*Tomomi Tatebe*<sup>a</sup>, *Takashi Harada*<sup>b</sup>, *Kazuhide Kamiya*<sup>\*a,b</sup>

*and Shuji Nakanishi*<sup>\*a,b</sup>

<sup>a</sup> *Department of Chemistry, Graduate School of Engineering Science, Osaka University*

*1-3 Machikaneyama, Toyonaka, Osaka 560-8531 (Japan)*

<sup>b</sup> *Research Center for Solar Energy Chemistry, Osaka University 1-3 Machikaneyama,*

*Toyonaka, Osaka 560-8531 (Japan)*

\*Corresponding author. Tel: +81-6-6850-6696, Fax: +81-6-6850-6699

E-mail: [nakanishi@chem.es.osaka-u.ac.jp](mailto:nakanishi@chem.es.osaka-u.ac.jp), [kamiya@chem.es.osaka-u.ac.jp](mailto:kamiya@chem.es.osaka-u.ac.jp)

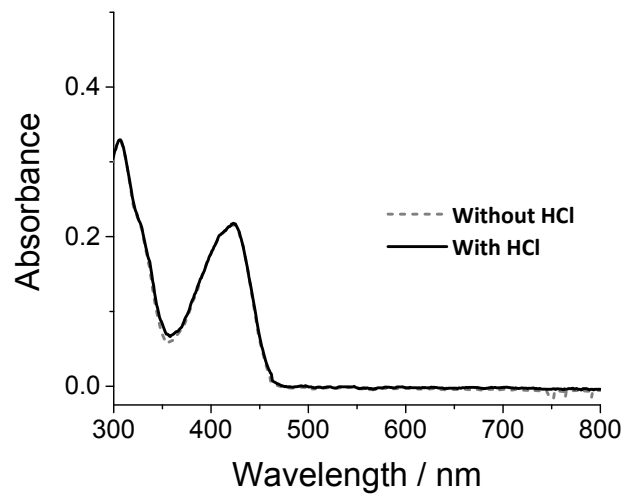

Figure S1. UV-visible absorption spectra for  $K_3[Fe(CN)_6]$  in the acidic solutions which we used for the synthesis with (solid line) and without (dashed line) HCl.

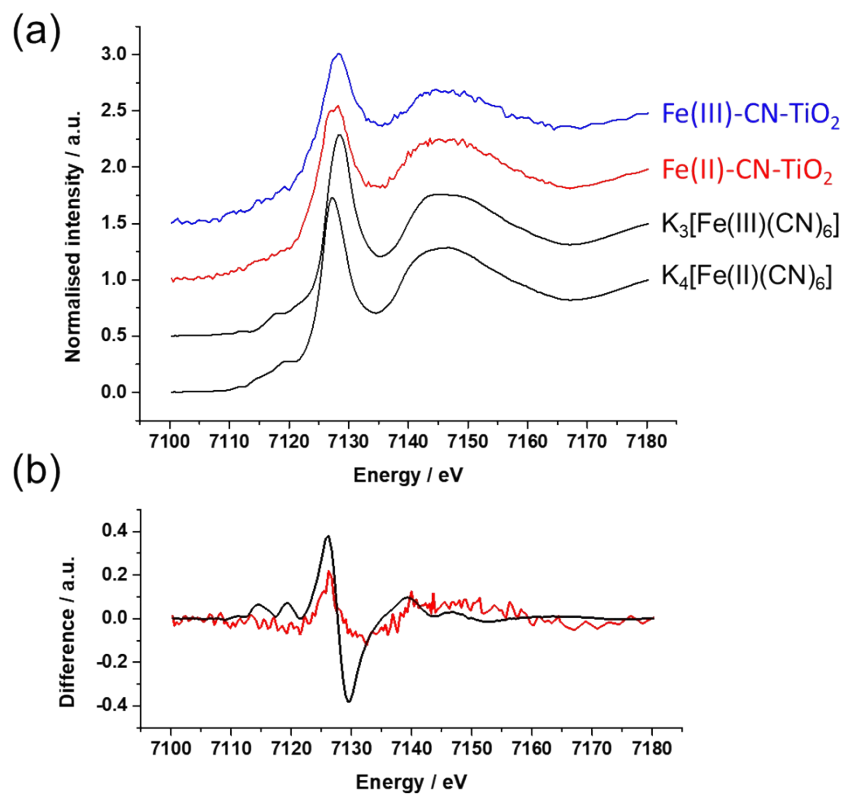

Figure S2. (a) Fe-K edge XANES spectra for K<sub>4</sub>[Fe(CN)<sub>6</sub>], K<sub>3</sub>[Fe(CN)<sub>6</sub>], Fe(II)-CN-TiO<sub>2</sub> and Fe(III)-CN-TiO<sub>2</sub>. (b) Differences between K<sub>4</sub>[Fe(CN)<sub>6</sub>] and K<sub>3</sub>[Fe(CN)<sub>6</sub>] (black), and between Fe(II)-CN-TiO<sub>2</sub> and Fe(III)-CN-TiO<sub>2</sub> (red). For the XAFS measurements, 0.032 wt% Fe modified Fe(II)-CN-TiO<sub>2</sub> and Fe(III)-CN-TiO<sub>2</sub> were used.

K<sub>4</sub>[Fe(CN)<sub>6</sub>] and K<sub>3</sub>[Fe(CN)<sub>6</sub>] exhibited the 1s to 4p transition peak at 7127.2 and 7128.4 eV, respectively, which are essentially consistent with the previous studies.<sup>S1</sup> The transition peaks of Fe(II)- and Fe(III)-CN-TiO<sub>2</sub> were located at 7127.5 eV and 7128.3, respectively. These results reveal

that the oxidation state of the Fe species in Fe-CN-TiO<sub>2</sub> basically corresponded to that of these precursors. However, the XANES signals for our samples were too noisy to quantitatively identify the ratio of Fe(III)/Fe(II) because of the low content of Fe. The further characterization of oxidation state is under progress in our laboratory by using more sensitive methods, such as Mössbauer and soft X-ray absorption spectrometry.

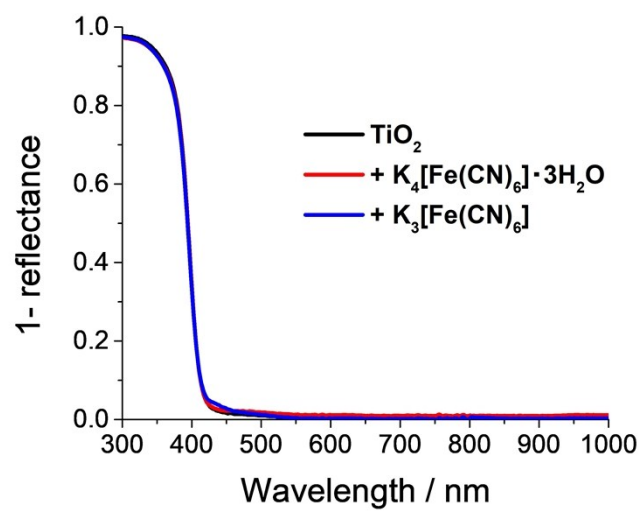

Figure S3. UV-visible reflectance spectra for TiO<sub>2</sub> (black), and the physical mixture of K<sub>3</sub>[Fe(CN)<sub>6</sub>]/TiO<sub>2</sub> (blue) and K<sub>4</sub>[Fe(CN)<sub>6</sub>] · 3H<sub>2</sub>O/TiO<sub>2</sub> (red). Fe ratio:0.010 wt%.

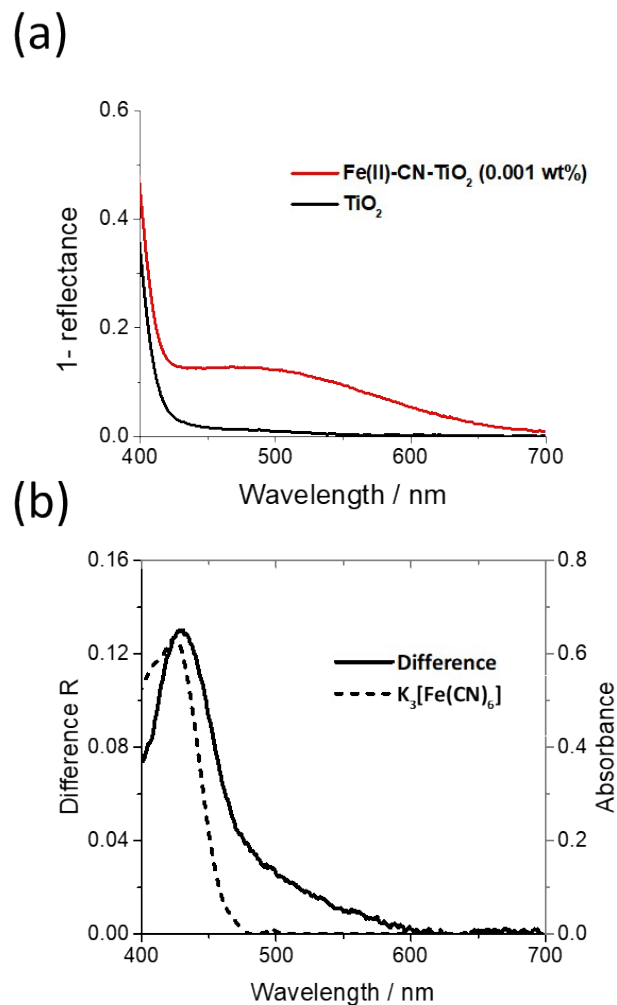

Figure S4. (a) UV-visible reflectance spectra for  $\text{TiO}_2$  (black) and 0.001 wt% Fe modified Fe(II)-CN- $\text{TiO}_2$  (red) (b) The difference spectra between 0.010 wt% Fe modified Fe(III)-CN- $\text{TiO}_2$  and 0.001 wt% Fe modified Fe(II)-CN- $\text{TiO}_2$  and absorption spectrum of  $\text{K}_3[\text{Fe}(\text{CN})_6]$ . For the difference spectra, we normalized each spectra by the reflectance at 630 nm.

We cannot exclude the existence of Fe(II) in Fe(III)-CN- $\text{TiO}_2$ . However, the absorption of Fe(III)-CN- $\text{TiO}_2$  in the range of 480 nm to 650 nm was a little smaller than that of Fe(II)-CN- $\text{TiO}_2$  with low Fe content. Therefore, the concentration of Fe(II) in Fe(III)-CN- $\text{TiO}_2$  was below 0.001 wt % (just 10 % of all Fe atoms).

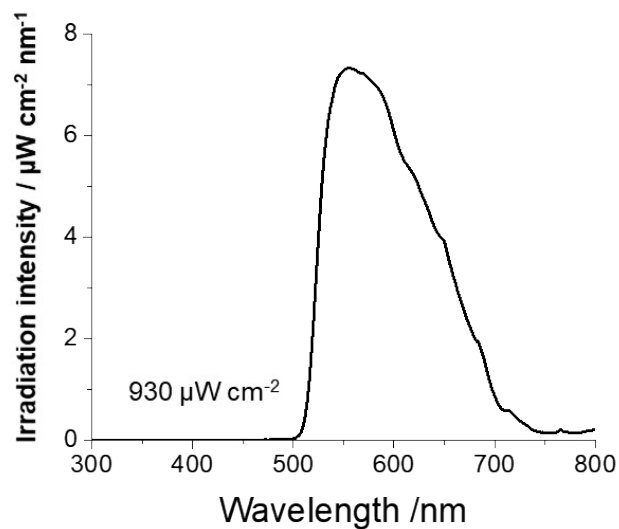

Figure S5. Light source used for investigation of the changes in the diffuse reflectance spectra of Fe(III)-CN-TiO<sub>2</sub>.

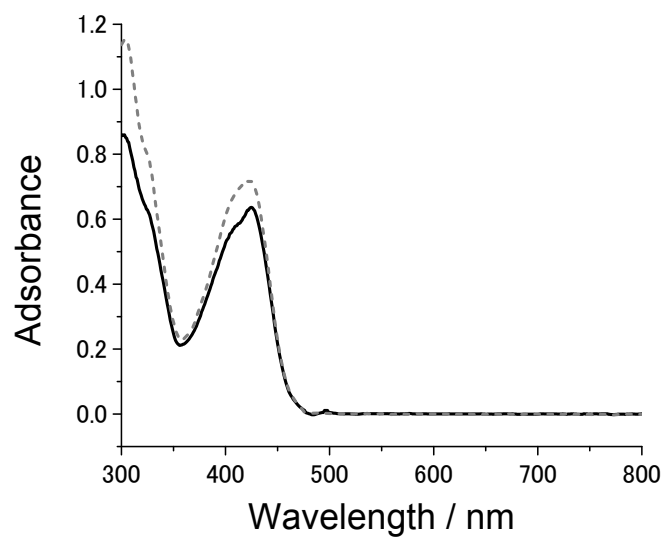

Figure S6. UV-visible absorption spectra for 0.6 mM K<sub>3</sub>[Fe(CN)<sub>6</sub>] aqueous solution before (solid line) and after (dashed line) visible light irradiation (21 h).

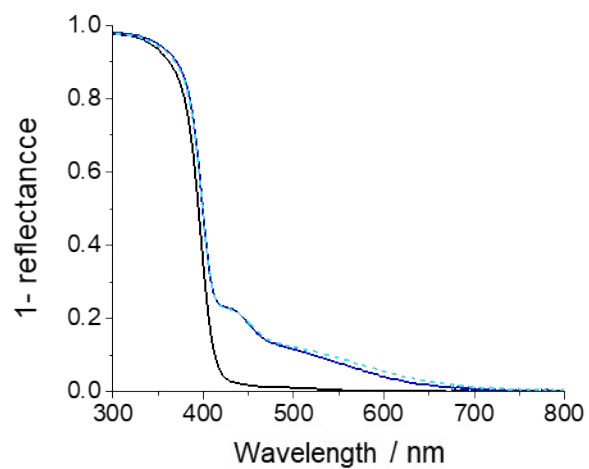

Figure S7. UV-visible reflectance spectra for bare TiO<sub>2</sub> (black line), and for Fe(III)-CN-TiO<sub>2</sub> before (solid blue line) and after (dotted light blue line) dark storage at 60 °C (1.5 h).

[S1] F. Grandjean, L. Samain and G. J. Long, *Dalton Transactions*, 2016, **45**, 18018.
